# Supplementary figures and images for: Dysregulated Ca2+ signaling, fluid secretion, and mitochondrial function in a mouse model of early Sjögren’s disease
Source: eLife journal article supplement (doi:10.7554/elife.97069), 2024-05-24

TMEM16a

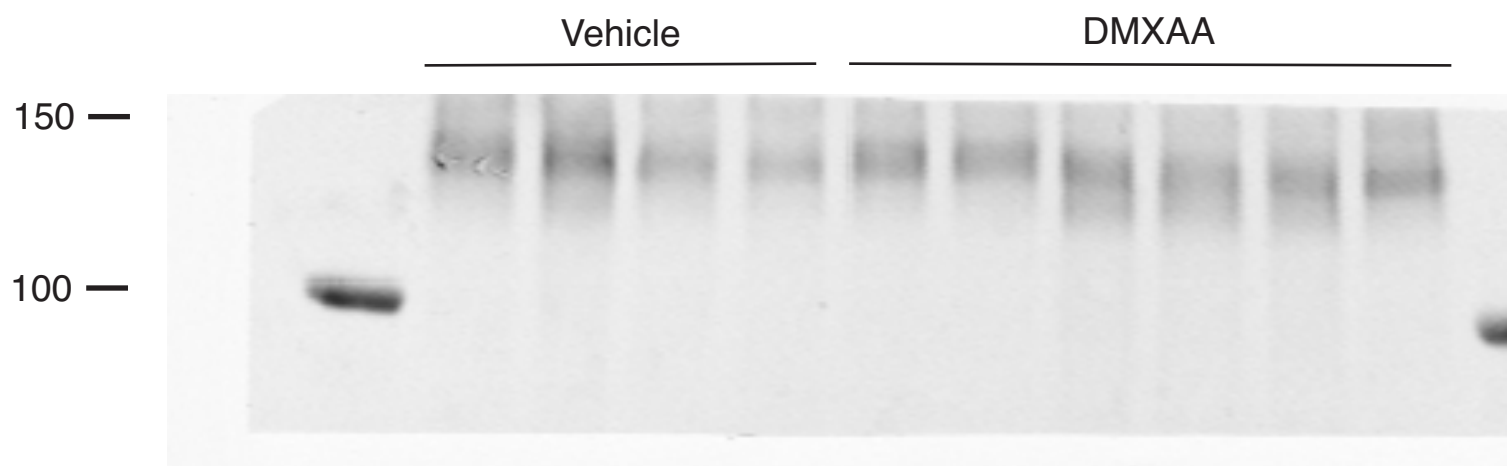

AQO5

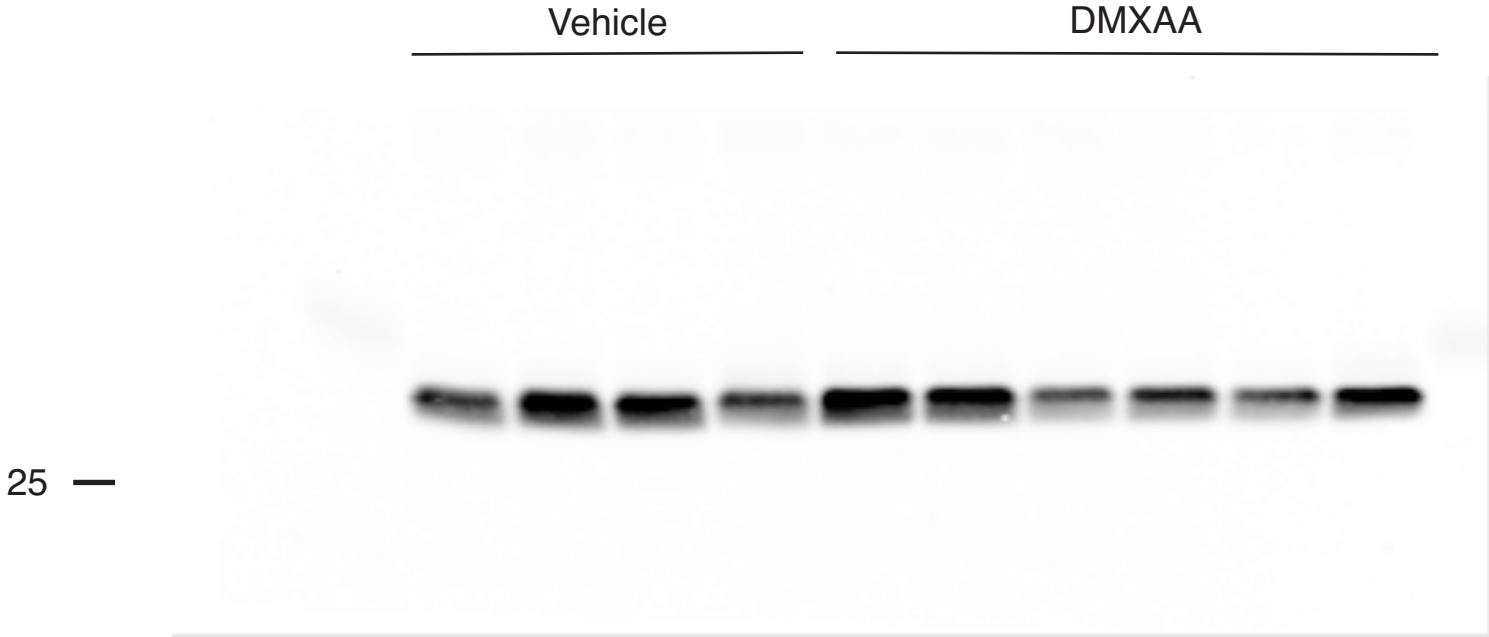

Actin

Vehicle

DMXAA

50 —  
37 —

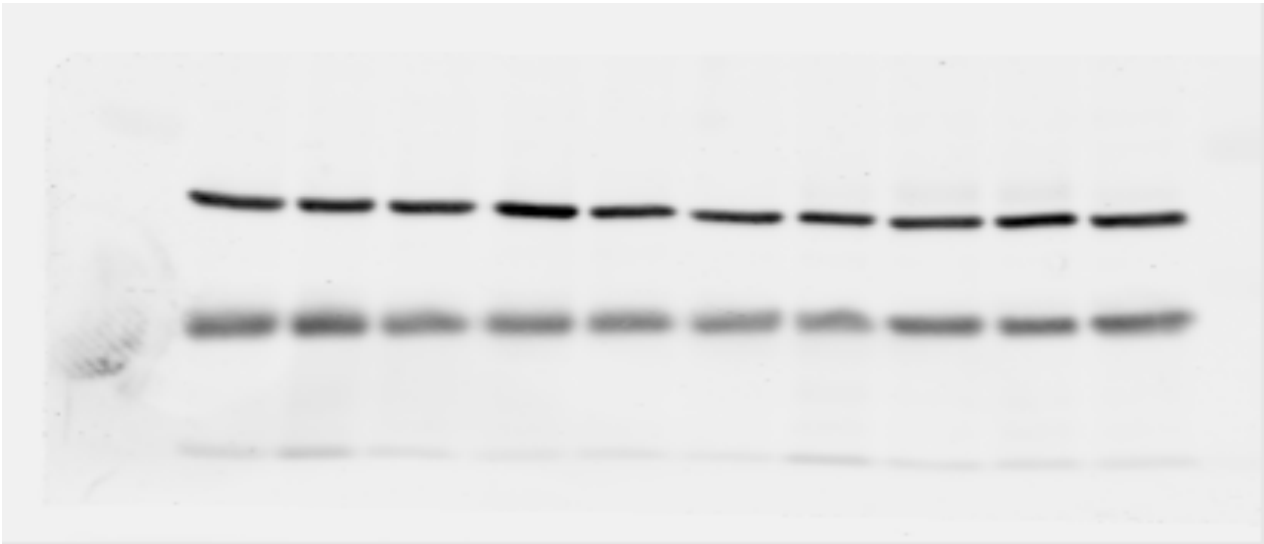

Supplement: fig4-data2 [file elife-97069-fig4-data2-v1.zip]

Actin

Vehicle

DMXAA

50 —

37 —

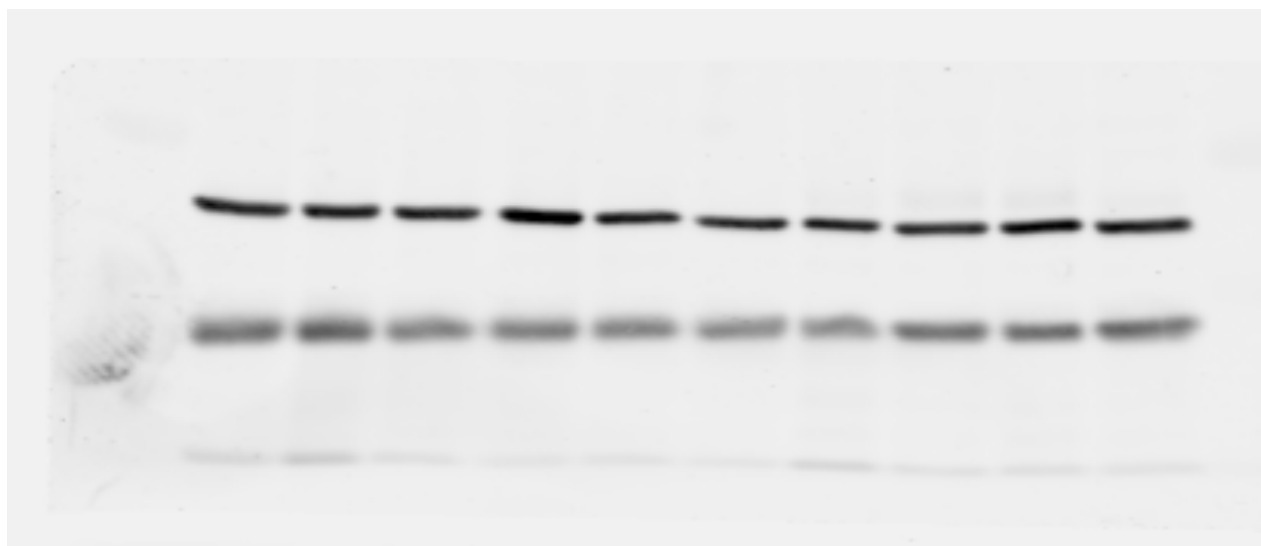

Supplement: fig4-data2 [file elife-97069-fig4-data2-v1.zip]

AQP5

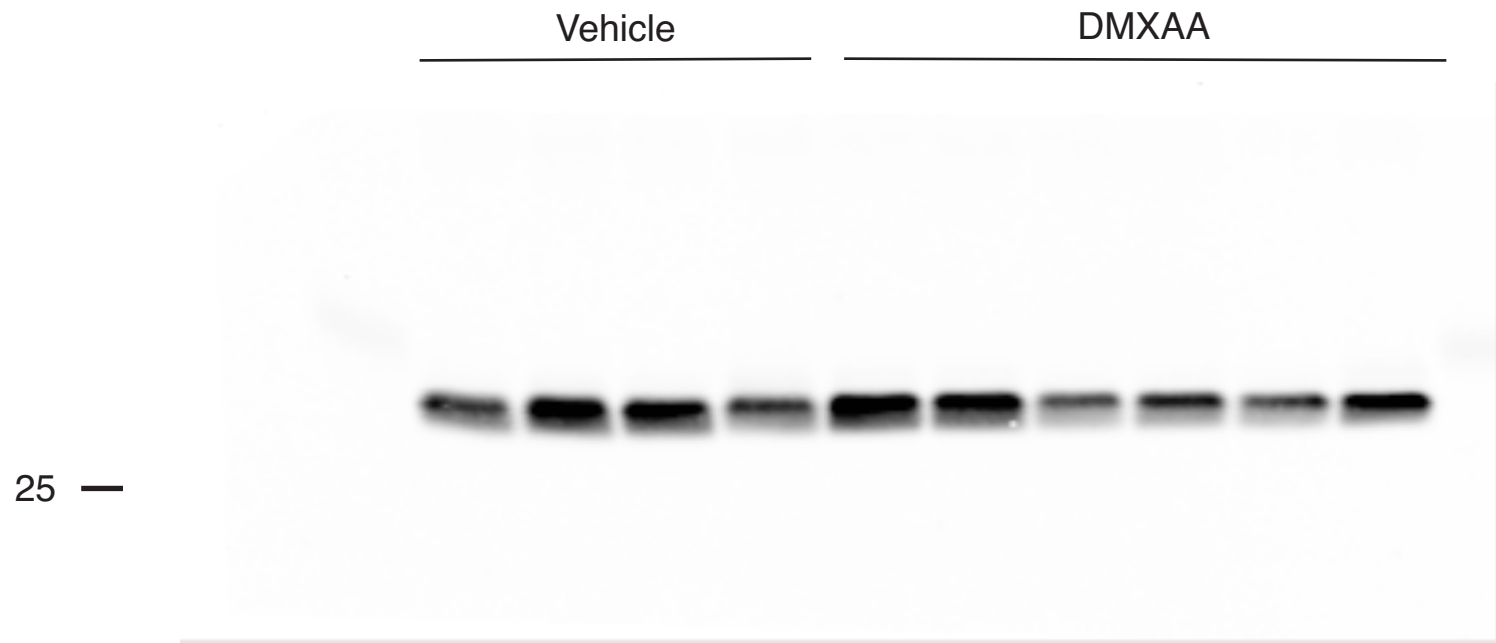

Actin

Vehicle

DMXAA

50 —  
37 —



Supplement: fig4-figsupp1-data2 [file elife-97069-fig4-figsupp1-data2-v1.zip]

IP3R3

Vehicle

DMXAA

250 —

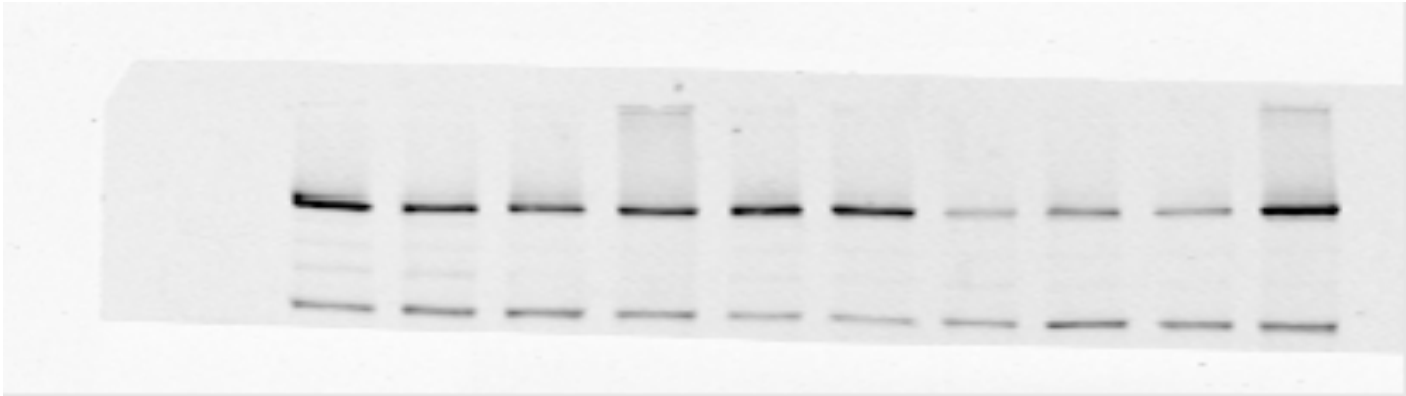

TMEM16a

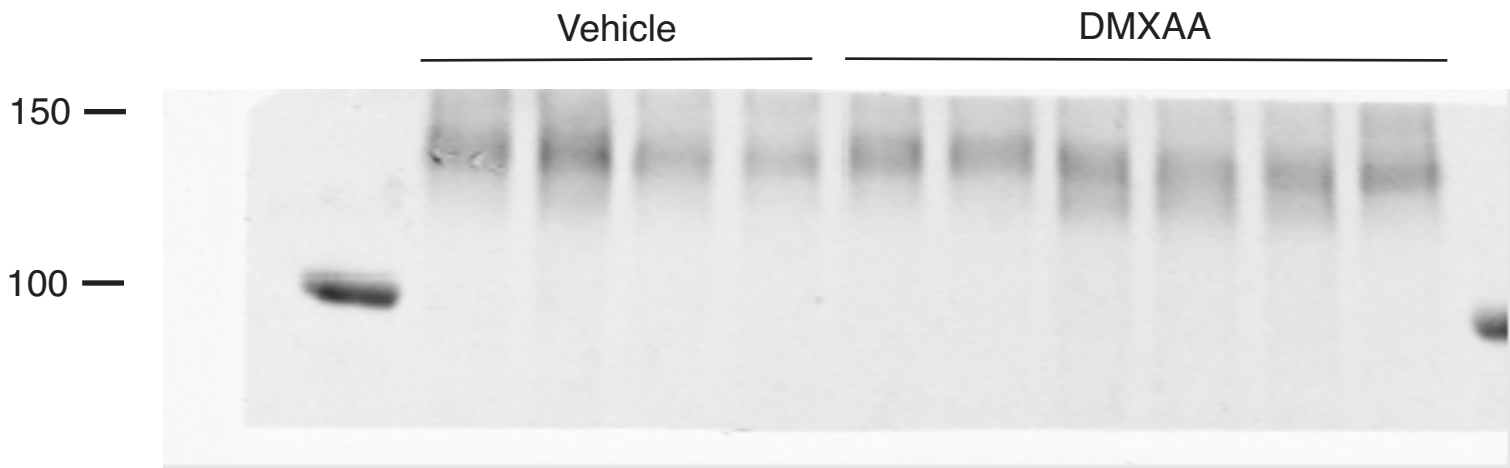

AQO5



Actin

Vehicle

DMXAA

50 —  
37 —



Supplement: fig7-figsupp1-data2 [file elife-97069-fig7-figsupp1-data2-v1.zip]

IP3R2

Vehicle

DMXAA

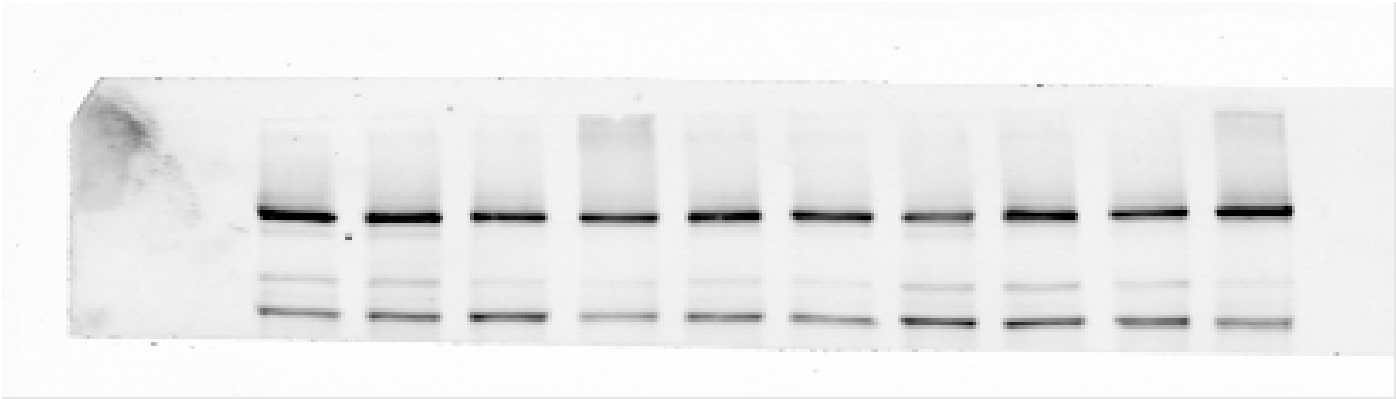

IP3R3

Vehicle

DMXAA

250 —

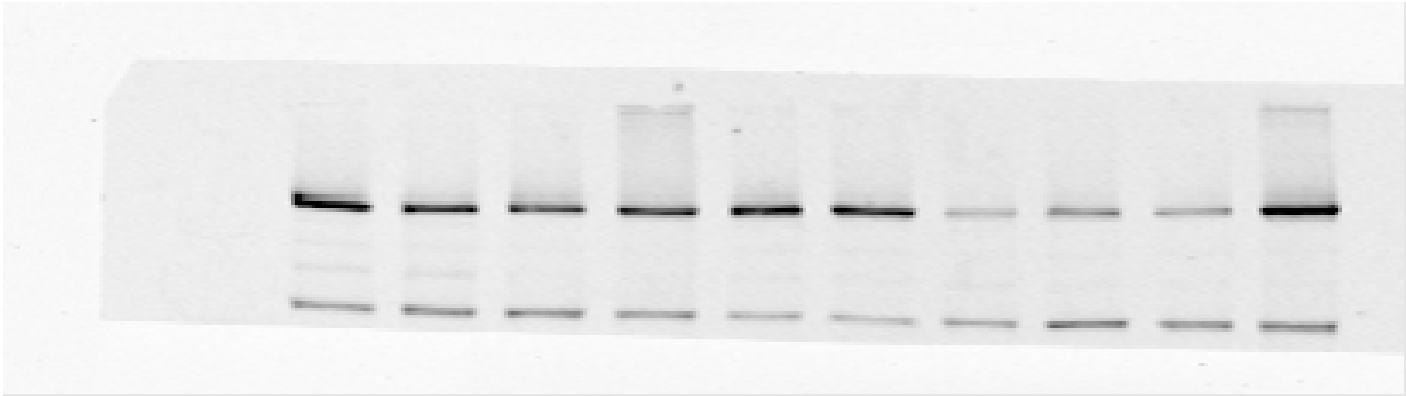

TMEM16a

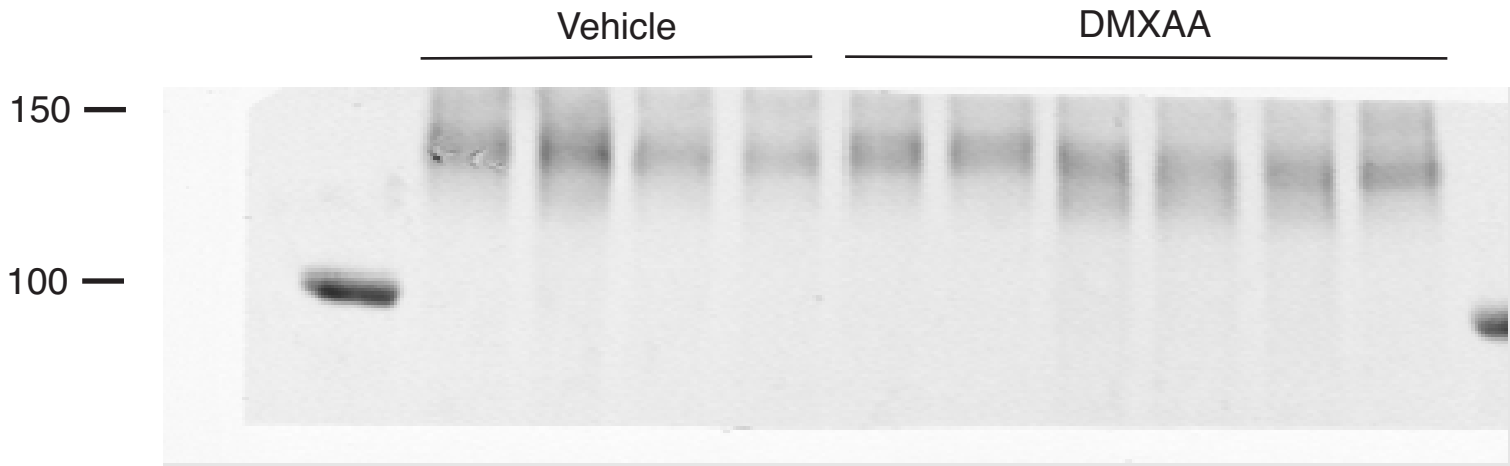

AQO5

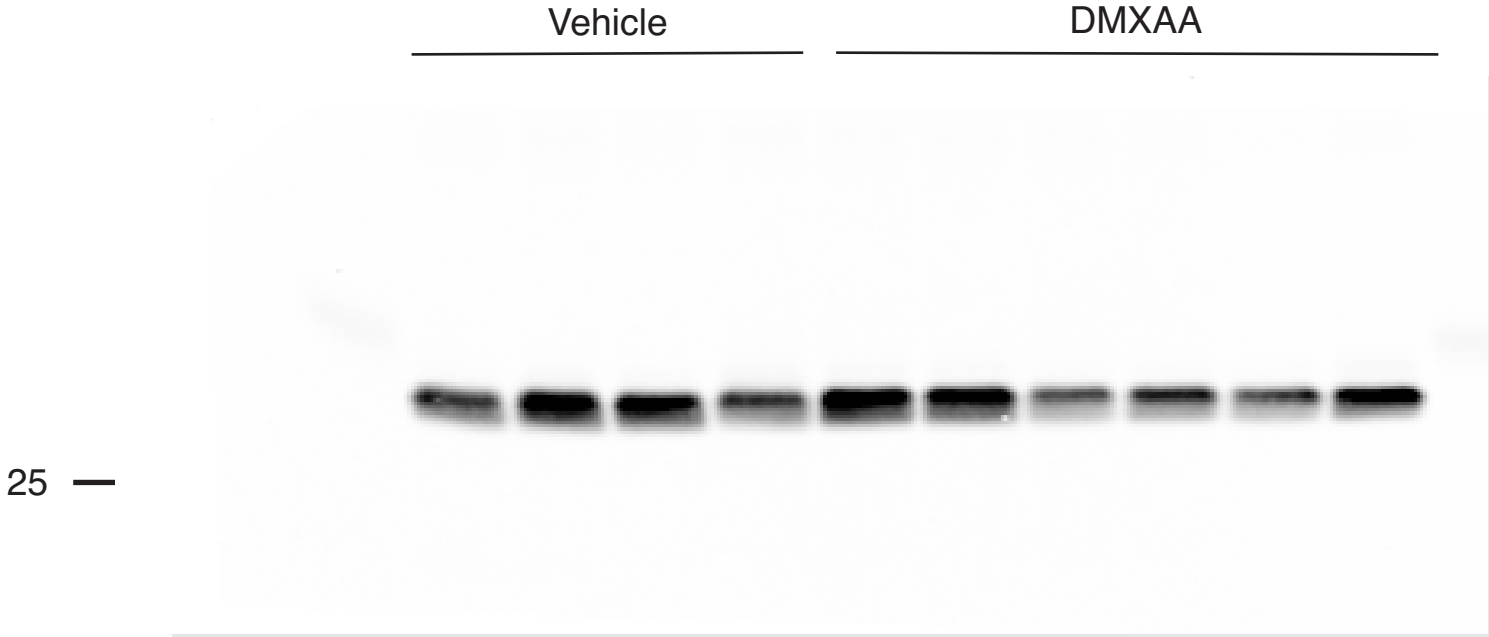

Actin

Vehicle

DMXAA

50 —

37 —

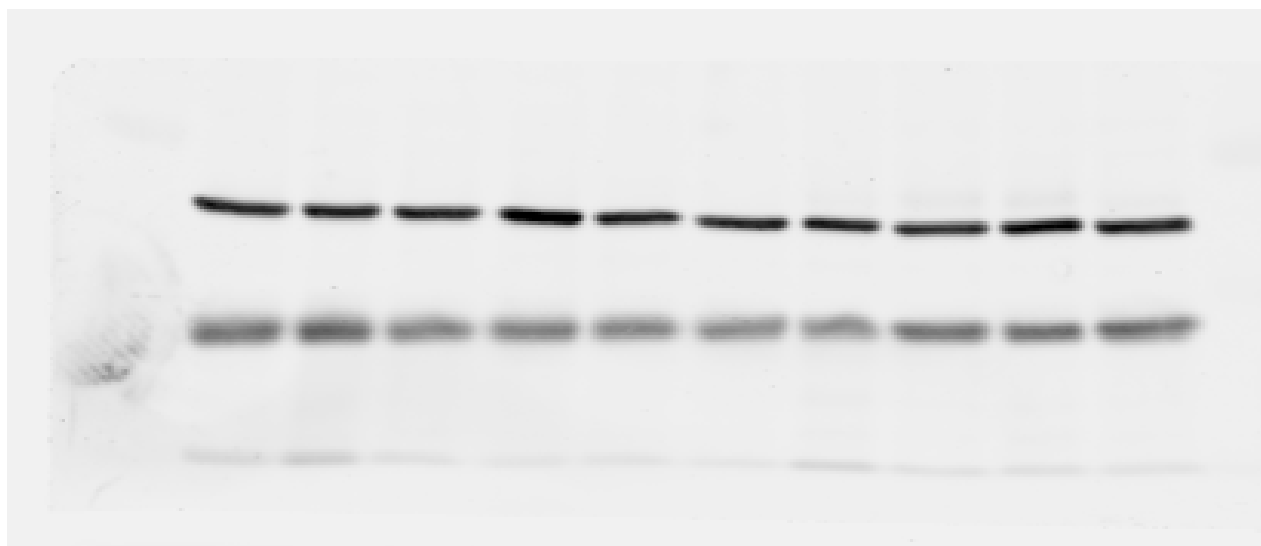

Supplement: fig7-figsupp1-data2 [file elife-97069-fig7-figsupp1-data2-v1.zip]
